# Supplementary material for: Self-powered multifunctional UV and IR photodetector as an artificial electronic eye
Source: Royal Society of Chemistry journal article supplement (doi:10.1039/c6tc04771h), 2017-01-01
Supplement: c6tc04771h1.pdf [file c6tc04771h1.pdf]

## Electronic Supplementary Information

# Self-powered Multifunctional UV and IR Photodetector as Artificial Electronic Eye

*Yinben Guo*<sup>a</sup>, *Yaogang Li*<sup>b</sup>, *Qinghong Zhang*<sup>b\*</sup>, *Hongzhi Wang*<sup>a\*</sup>

<sup>a</sup>State Key Laboratory for Modification of Chemical Fibers and Polymer Materials,  
College of Materials Science and Engineering, Donghua University, Shanghai  
201620, People's Republic of China.

<sup>b</sup>Engineering Research Center of Advanced Glasses Manufacturing Technology,  
Ministry of Education, Donghua University, Shanghai 201620, People's Republic of  
China.

### Corresponding Author

\* Tel: +86-21-67792881; fax: +86-21-67792855. E-mail address:

zhangqh@dhu.edu.cn (Q. H. Zhang), wanghz@dhu.edu.cn (H. Z. Wang).

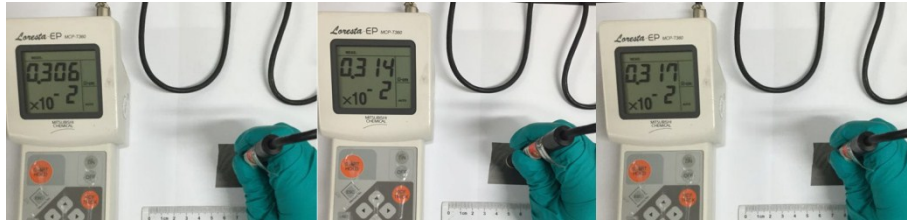

Figure S1. Digital photographs of conductivity test process of the RGO film using a four-point probe system.

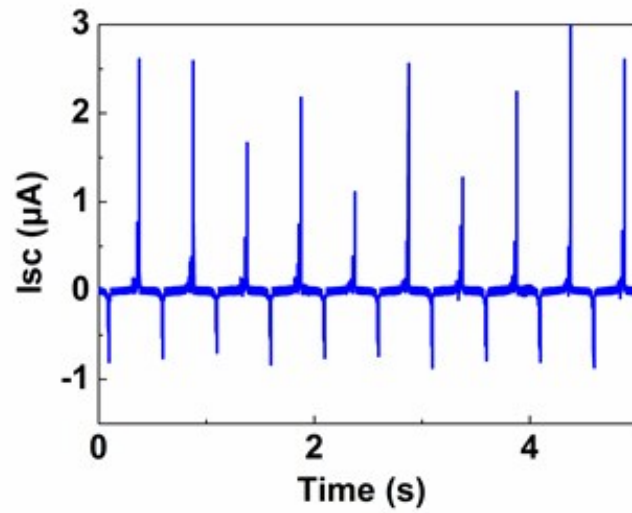

Figure S2. Short-circuit current of TENG after 12000 contact-separation cycles

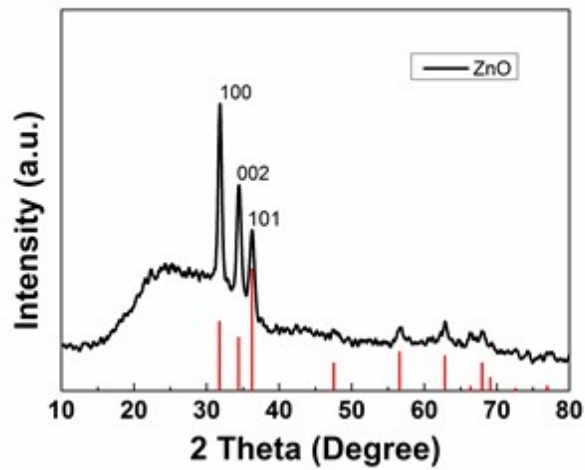

Figure S3. XRD pattern of ZnO thin layer

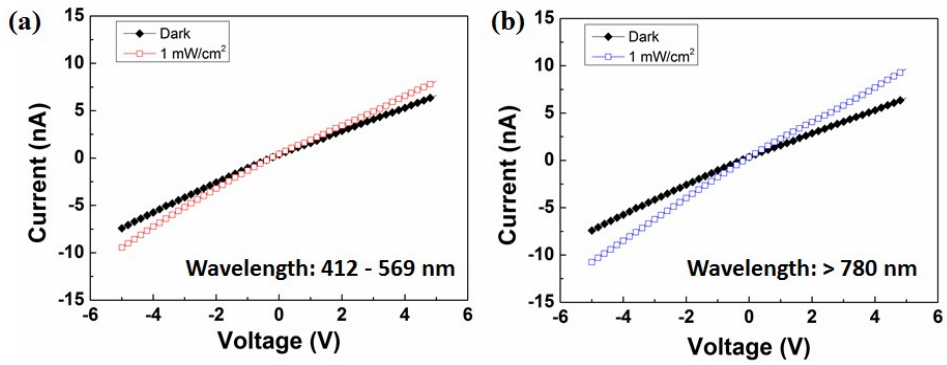

Figure S4. Dark and photocurrents of MSM UV photodetector with (a) visible light illumination, (b) IR illumination, at 5 V forward and reverse bias.

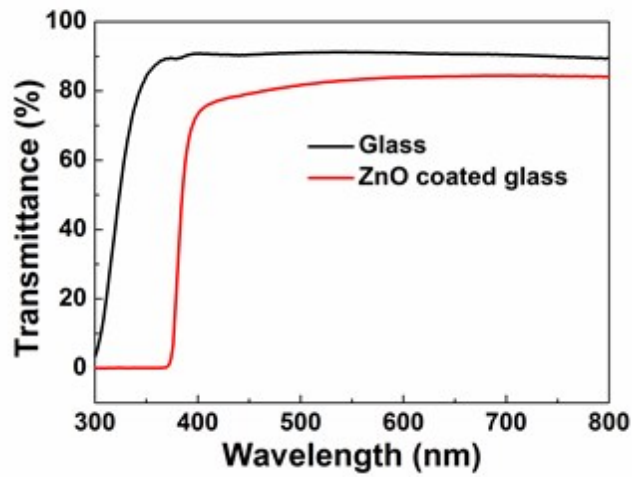

Figure S5. UV-Vis transmission spectrum of glass and ZnO coated glass.

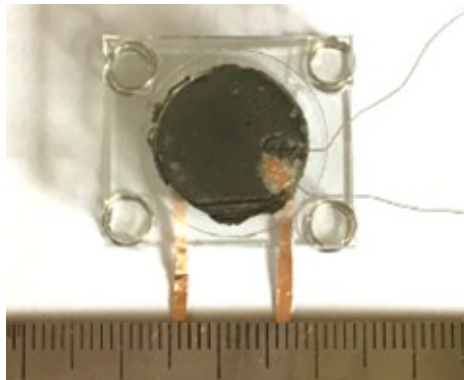

Figure S6. The digital picture of the integrated electronic eye (the minimum scale on the ruler is 1 mm).

Table S1 Comparison of the characteristic parameters of different photodetector

| Photodetector                       | Wavelength(nm) | R (A/W)                 | D*(10 <sup>12</sup> Jones) | Response time<br>(rise/decay time) | Ref..     |
|-------------------------------------|----------------|-------------------------|----------------------------|------------------------------------|-----------|
| Ag-ZnO-Ag                           | 365            | 0.25                    | 4.2                        | 10.3 s/18.1 s                      | This work |
| ZnO/SnO <sub>2</sub>                | 300            | -                       | -                          | 32.2 s/7.8 s                       | S1        |
| Cu NW/ZnO                           | 360 360        | 0.26 × 10 <sup>-3</sup> | -                          | < 0.5 s/>30 s> 30 s                | S2        |
| ZnO NWs/Au                          | 365            | 0.40                    | -                          | 0.13 s/0.40 s                      | S3        |
| Au1-ZnO-Au2                         | <400           | 0.02                    | -                          | -                                  | S4        |
| Pt-GaN-Ni                           | <400           | 0.03                    | 1.78                       | -                                  | S5        |
| TiO <sub>2</sub> -PANI              | 320            | 0.36 × 10 <sup>-2</sup> | 0.39                       | 3.8 ms/30.7 ms                     | S6        |
| SnO <sub>2</sub> /NiO               | <400           | -                       | -                          | 17 s / 9 s                         | S7        |
| TiO <sub>2</sub> /NiO               | 350            | 0.67 × 10 <sup>-3</sup> | 1.1 × 10 <sup>-2</sup>     | 1.2 s/7.1 s                        | S8        |
| Ni/TiO <sub>2</sub> /Ni             | 260            | 889.6                   | -                          | 13.34 ms/11.43s11.4s               | S9        |
| Bi/WS <sub>2</sub> /Si              | 635            | 0.42                    | 13.6                       | <100 ms/-                          | S10       |
| Bi <sub>2</sub> Te <sub>3</sub> /Si | 635            | 1                       | 0.25                       | <100 ms/-                          | S11       |

#### Reference

- S1. W. Tian, T. Zhai, C. Zhang, S. L. Li, X. Wang, F. Liu, D. Liu, X. Cai, K. Tsukagoshi, D. Golberg and Y. Bando, *Adv. Mater.*, 2013, **25**, 4625.
- S2. F. Teng, L. X. Zheng, K. Hu, H. Y. Chen, Y. M. Li, Z. M. Zhang and X. S. Fang, *J. Mater. Chem. C*, 2016, **4**, 8416.
- S3. Y. Zeng, Z. Ye, B. Lu, W. Dai and X. Pan, *Appl. Phys. A*, 2016, **122**, 296.
- S4. H. Y. Chen, K. W. Liu, X. Chen, Z. Zhang, M. Fan, M. Jiang, X. H. Xie, H. F. Zhao and D. Z. Shen, *J. Mater. Chem. C*, 2014, **2**, 9689.
- S5. M. Peng, Y. Liu, A. Yu, Y. Zhang, C. Liu, J. Liu, W. Wu, K. Zhang, X. Shi, J. Kou, J. Zhai and Z. L. Wang, *ACS Nano*, 2016, **10**, 1572.
- S6. L. Zheng, P. Yu, K. Hu, F. Teng, H. Chen and X. Fang, *ACS Appl. Mater. Interfaces*, 2016, **8**, 33924.
- S7. S. Huang, H. Wu, K. Matsubara, J. Cheng and W. Pan, *Chem. Commun.*, 2014, **50**, 2847.
- S8. L. Zheng, F. Teng, Z. Zhang, B. Zhao and X. Fang, *J. Mater. Chem. C*, 2016, **4**, 10032.
- S9. X. Kong, C. Liu, W. Dong, X. Zhang, C. Tao, L. Shen, J. Zhou, Y. Fei and S. Ruan, *Appl. Phys. Lett.*, 2009, **94**, 123502.
- S10. J. Yao, Z. Zheng, J. Shao and G. Yang, *ACS Appl. Mater. Interfaces*, 2015, **7**, 26701.
- S11. J. Yao, J. Shao, Y. Wang, Z. Zhao and G. Yang, *Nanoscale*, 2015, **7**, 12535.
